# Supplementary material
Source: MDPI journal article supplement (https://www.mdpi.com/2077-0472/14/5/745)
Supplement: s1 [file s1]

Table S1 Antagonism between parents and hybrids

|          | p | A2<br>8 | A2<br>26 | A9<br>7 | A4<br>18 | A2<br>17 | A4<br>26 | A2<br>03 | A5<br>4 | A8<br>8 | A5<br>3 | A3<br>37 | A2<br>1 | A3<br>82 | A4<br>13 |
|----------|---|---------|----------|---------|----------|----------|----------|----------|---------|---------|---------|----------|---------|----------|----------|
| p        |   | √       | √        | √       | √        | √        | √        | √        | √       | √       | √       | √        | √       | √        | √        |
| A2<br>8  |   |         | √        | √       | √        | √        | √        | √        | √       | √       | √       | √        | ×       | √        | √        |
| A2<br>26 |   |         |          | √       | √        | √        | √        | √        | √       | √       | √       | √        | √       | √        | √        |
| A9<br>7  |   |         |          |         | √        | √        | √        | √        | √       | √       | √       | √        | √       | √        | √        |
| A4<br>18 |   |         |          |         |          | √        | √        | √        | √       | √       | √       | √        | √       | √        | √        |
| A2<br>17 |   |         |          |         |          |          | √        | √        | √       | √       | √       | √        | √       | √        | √        |
| A4<br>26 |   |         |          |         |          |          |          | √        | √       | √       | √       | √        | √       | √        | √        |
| A2<br>03 |   |         |          |         |          |          |          |          | √       | √       | √       | √        | √       | √        | √        |
| A5<br>4  |   |         |          |         |          |          |          |          |         | √       | √       | √        | √       | √        | √        |
| A8<br>8  |   |         |          |         |          |          |          |          |         |         | √       | √        | √       | √        | √        |
| A5<br>3  |   |         |          |         |          |          |          |          |         |         |         | √        | √       | √        | √        |
| A3<br>37 |   |         |          |         |          |          |          |          |         |         |         |          | √       | √        | √        |
| A2<br>1  |   |         |          |         |          |          |          |          |         |         |         |          |         | √        | √        |
| A3<br>82 |   |         |          |         |          |          |          |          |         |         |         |          |         |          | √        |
| A4<br>13 |   |         |          |         |          |          |          |          |         |         |         |          |         |          |          |

Footnote: √: clamp connection, ×: no clamp connection.

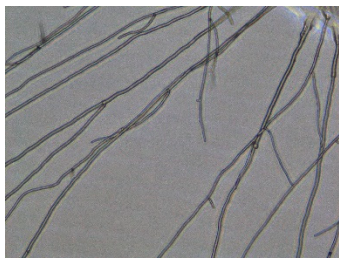

Figure S1 Morphology of monokaryotic strains mycelium

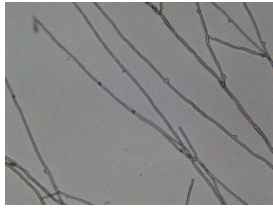

Figure S2 Morphology of hybrid mycelium

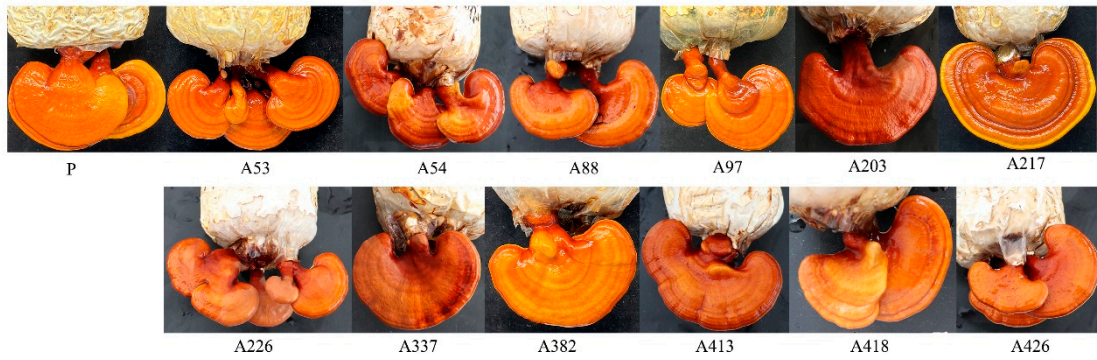

Figure S3 Fruiting body morphology of hybrids
